# Supplementary material
Source: Springer Nature journal article supplement (https://www.springermedizin.de/resource/supplementary/13054_2010_8715_MOESM2_ESM.pdf/9734072)

Identification

Records identified through  
database searching  
(n = 1070)

Additional records identified  
through other sources  
(n = 6)

Screening

Records screened  
(n = 1076)

Eligibility

Full-text articles assessed  
for eligibility  
(n = 75)

Full-text articles excluded,  
with reasons  
(n = 2)

Included

Studies included in  
quantitative synthesis  
(meta-analysis)  
(n = 73)

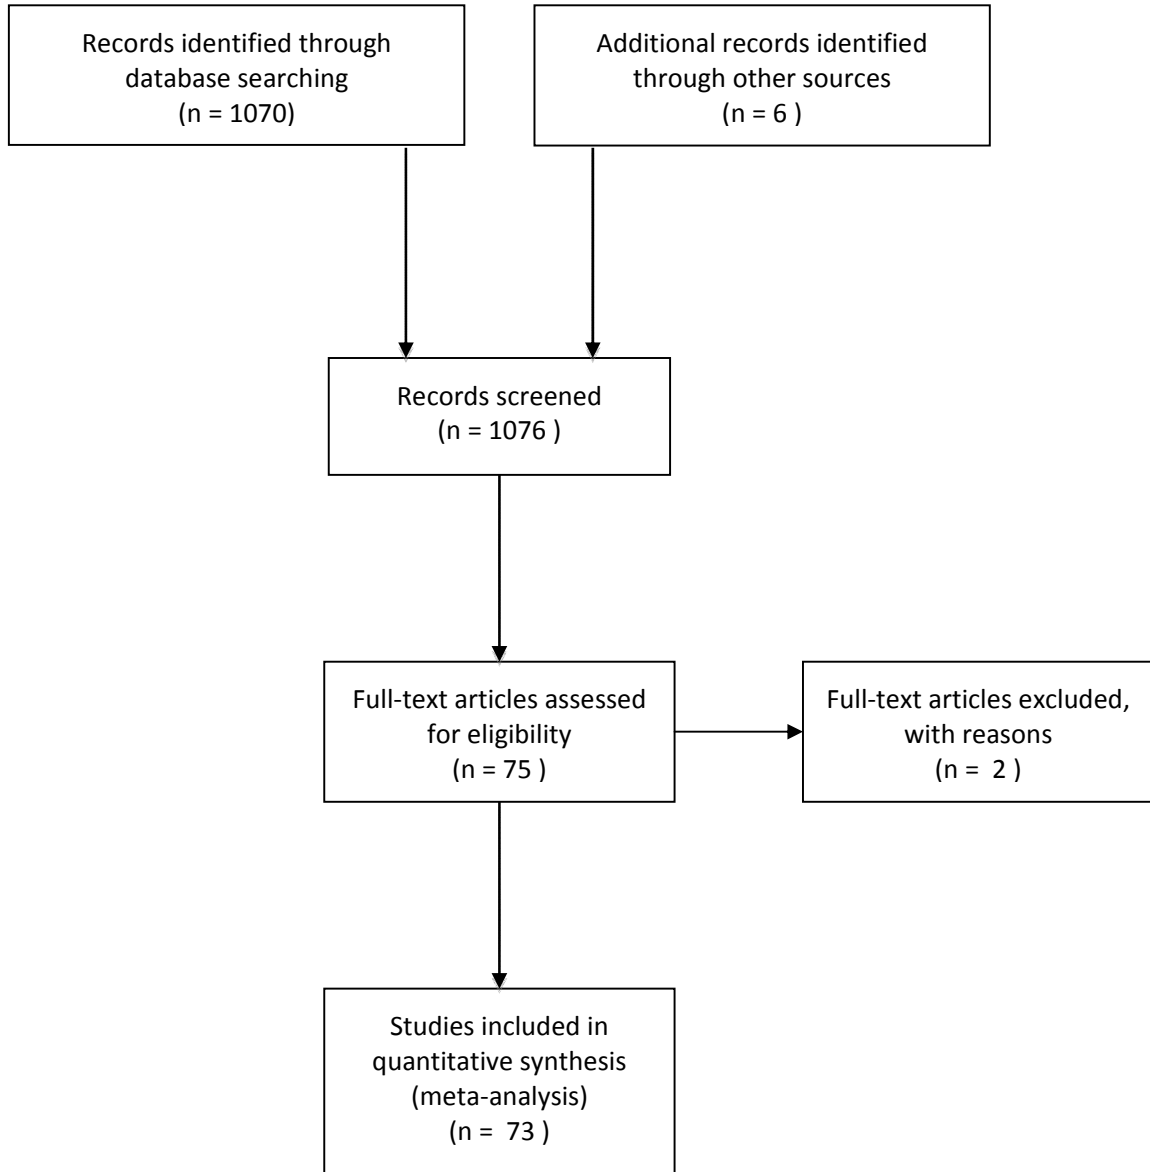

Supplement: MOESM2 [file 9734072]
